# Supplementary material for: Evaluating the Image Quality of Neck Structures Scanned on Chest CT with Low-Concentration-Iodine Contrast Media
Source: Tomography. 2022 Nov 28;8(6):2854–63. doi: 10.3390/tomography8060239 (PMC9785131; doi:10.3390/tomography8060239)
Supplement: Supplementary file 1 [file tomography-08-00239-s001.zip › tomography-1965058-supplementary.pdf]

## Supplemental Material

**Table S1:** In machine A, comparing the group with 240 iodine contrast media (CM) and the group with 320 iodine CM.

|                       | Group with 240 iodine CM in machine A (n=77) | Group with 320 iodine CM in machine A (n=107) | <i>p</i> -value |
|-----------------------|----------------------------------------------|-----------------------------------------------|-----------------|
| Sharpness             | 2.92 ± 0.24                                  | 2.96 ± 0.18                                   | 0.28            |
| Noise                 | 2.34 ± 0.46                                  | 2.32 ± 0.41                                   | 0.76            |
| Overall image quality | 4.26 ± 0.59                                  | 4.28 ± 0.47                                   | 0.84            |

CM = contrast media

**Table S2:** In machine A, comparing the group with 240 iodine CM and relatively low kVp (90≥) and the group with 320 CM media and relatively high kVp (100≤).

|                       | Group with 240 iodine CM and relatively low kVp (90≥) in machine A (n=34) | Group with 320 iodine CM and relatively high kVp (100≤) in machine A (n=65) | <i>p</i> -value |
|-----------------------|---------------------------------------------------------------------------|-----------------------------------------------------------------------------|-----------------|
| Sharpness             | 2.93 ± 0.22                                                               | 2.98 ± 0.10                                                                 | 0.14            |
| Noise                 | 2.32 ± 0.41                                                               | 2.30 ± 0.42                                                                 | 0.79            |
| Overall image quality | 4.25 ± 0.51                                                               | 4.28 ± 0.44                                                                 | 0.73            |

**Table S3:** In machine B, comparing the group with 240 iodine CM and the group with 320 iodine CM.

|                       | Group with 240 iodine CM in machine B (n=82) | Group with 320 iodine CM in machine B (n=100) | <i>p</i> -value |
|-----------------------|----------------------------------------------|-----------------------------------------------|-----------------|
| Sharpness             | 2.90 ± 0.24                                  | 2.96 ± 0.18                                   | 0.10            |
| Noise                 | 2.19 ± 0.32                                  | 2.20 ± 0.33                                   | 0.82            |
| Overall image quality | 4.09 ± 0.47                                  | 4.16 ± 0.38                                   | 0.32            |

**Table S4:** In machine B, comparing the group with 240 iodine CM and relatively low kVp (90≥) and the group with 320 iodine CM and relatively high kVp (100≤).

|                       | Group with 240 iodine CM and relatively low kVp (90≥) in machine B (n=17) | Group with 320 iodine CM and relatively high kVp (100≤) in machine B (n=78) | <i>p</i> -value |
|-----------------------|---------------------------------------------------------------------------|-----------------------------------------------------------------------------|-----------------|
| Sharpness             | 2.94 ± 0.17                                                               | 2.94 ± 0.20                                                                 | 0.98            |
| Noise                 | 2.24 ± 0.31                                                               | 2.18 ± 0.27                                                                 | 0.79            |
| Overall image quality | 4.18 ± 0.39                                                               | 4.12 ± 0.35                                                                 | 0.73            |

**Table S5:** Effective doses between Group A and Group B.

|                | Group A (n=159) | Group B (n=207) | <i>p</i> -value |
|----------------|-----------------|-----------------|-----------------|
| Effective dose | 3.38 ± 1.14     | 3.38 ± 1.44     | 0.997           |
